# Supplementary material for: The developmental and iron nutritional pattern of PIC1 and NiCo does not support their interdependent and exclusive collaboration in chloroplast iron transport in Brassica napus
Source: PubMed Central journal article supplement (PMC7214486; doi:10.1007/s00425-020-03388-0), 2020-04-15
Supplement: 425_2020_3388_MOESM1_ESM.pdf [file 425_2020_3388_MOESM1_ESM.pdf]

*Supplementary Material*

**The developmental and iron nutritional pattern of PIC1 and NiCo does  
not support their interdependent and exclusive collaboration in  
chloroplast iron transport in *Brassica napus***

**Hong Diep Pham, Sára Pólya, Brigitta Müller, Kálmán Szenthe, Máté Sági-Kazár, Barbara Bánkúti, Ferenc Bánáti, Éva Sárvári, Ferenc Fodor, László Tamás, Katrin Philippar, Ádám Solti\***

**\*Correspondence:**

Ádám Solti, PhD

adam.solti@ttk.elte.hu

## Supplementary Figures

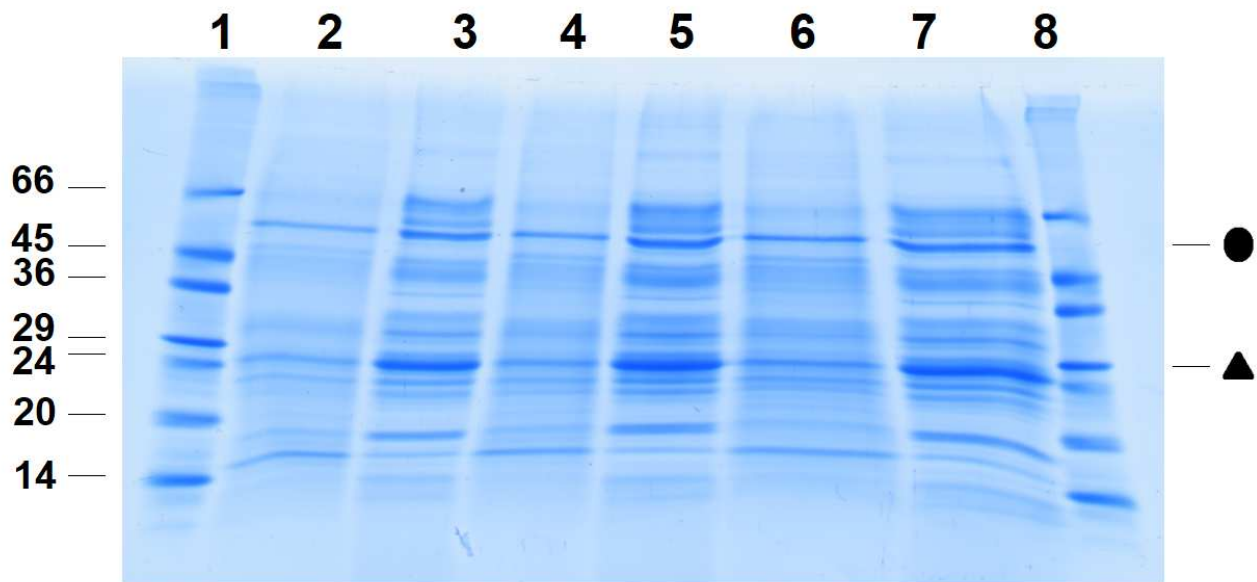

**Supplementary Fig. S1** Representative Coomassie stained SDS PAGE pattern of total chloroplast (2; 4; 6) and leaf (3; 5; 7) proteins isolated from 21-days old 4<sup>th</sup> leaves of plants grown under Fe deficient (2; 3) optimal Fe nutrition (4; 5) and superoptimal Fe nutrition (6; 7) conditions. As for molecular weight standards (1; 8),  $\alpha$ -lactalbumin, trypsin inhibitor, trypsinogen, carbonic anhydrase, glyceraldehyde-3-phosphate dehydrogenase, ovalbumin; bovine serum albumin (Sigma-Aldrich; Lot.: 123H9458; 5  $\mu$ g protein in total) were used. Lanes were loaded with 18; 12; 15; 8; 11; 8  $\mu$ g solubilised protein (lanes 2; 3; 4; 5; 6; 7, respectively). Circle – RbcL; triangle – apoLhcII. Ratios of RbcL to apoLhcII were 0.507; 0.580; 0.653; 0.673; 0.586; 0.664 in lanes 2; 3; 4; 5; 6; 7, respectively (the intactness of Fe deficient, optimal Fe nutrition and superoptimal Fe nutrition chloroplast samples were 87.5; 97.1; 88.2%, respectively).

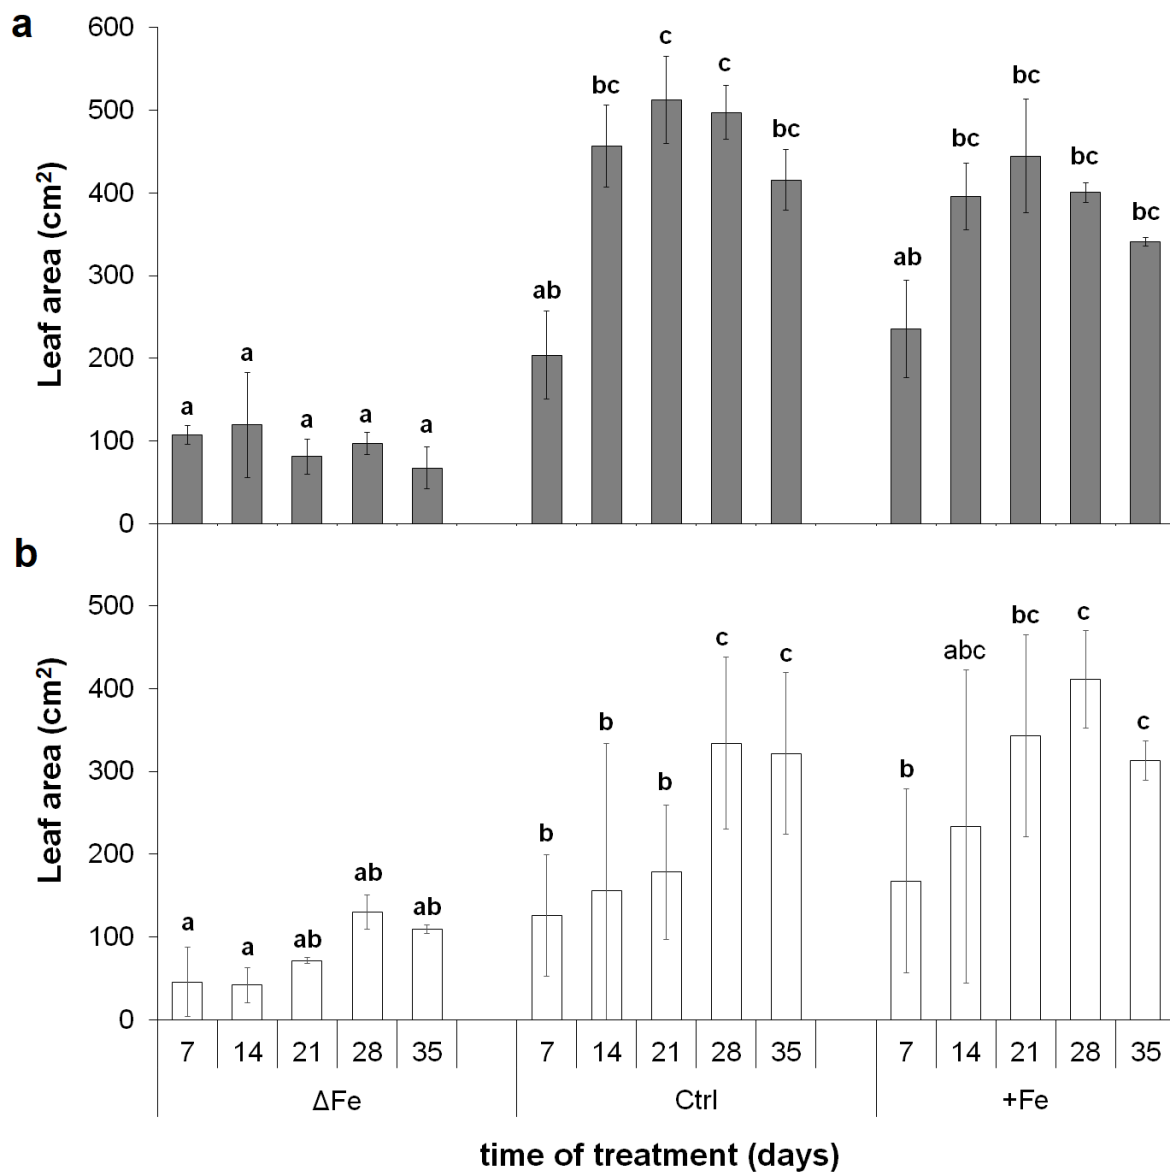

**Supplementary Fig. S2** Changes in the leaf area of *Brassica napus* plants during the time of treatment; **a** – 4<sup>th</sup> leaves; **b** – 6<sup>th</sup> leaves.  $\Delta\text{Fe}$  – Fe deficiency, Ctrl – optimal Fe nutrition (control), +Fe – superoptimal Fe nutrition. Error bars represent SD values. To compare the differences, one-way ANOVAs were performed with Tukey-Kramer *post-hoc* tests on the treatments ( $P < 0.05$ ;  $n = 3 \times 3$  [biological  $\times$  technical])

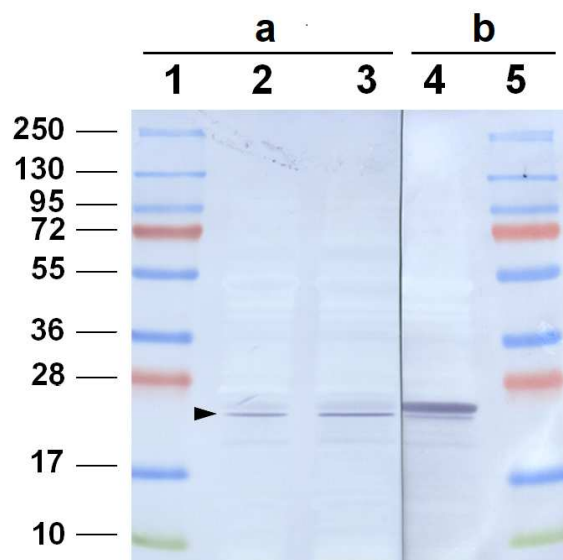

**Supplementary Fig. S3** Identification of BnNiCo protein in total chloroplast protein samples isolated from 4<sup>th</sup> leaves. Marks: 1, 5 – molecular weight standard; 2, 4 – proteins solubilized according to Laemmli UK (1970) Nature 227: 680; 3 – total proteins solubilized according to Duy D et al. (2007) Plant Cell 19: 986. using 250  $\mu\text{g ml}^{-1}$  Pefabloc instead of PMSF. Samples were run on the same gel and blotted to the same nitrocellulose membrane. After blotting, the membrane was cut (**a** and **b**) and treated with the antibodies separately. **a** – immunoblot against NiCo using rabbit polyclonal antiserum against the recombinant, C-terminal part of the *Pisum sativum* NiCo protein (amino acids 236–375); **b** – immunoblot against LHCII using rabbit polyclonal antibodies against Light Harvesting Complex II apoprotein. As for molecular weight standards, PageRuler™ Plus Prestained Protein Ladder (Thermo-Fisher Scientific; Lot.: 00463463) was used. Lanes were loaded with 30  $\mu\text{g}$  solubilised protein. Arrowhead is pointing on BnNiCo at 26 kDa

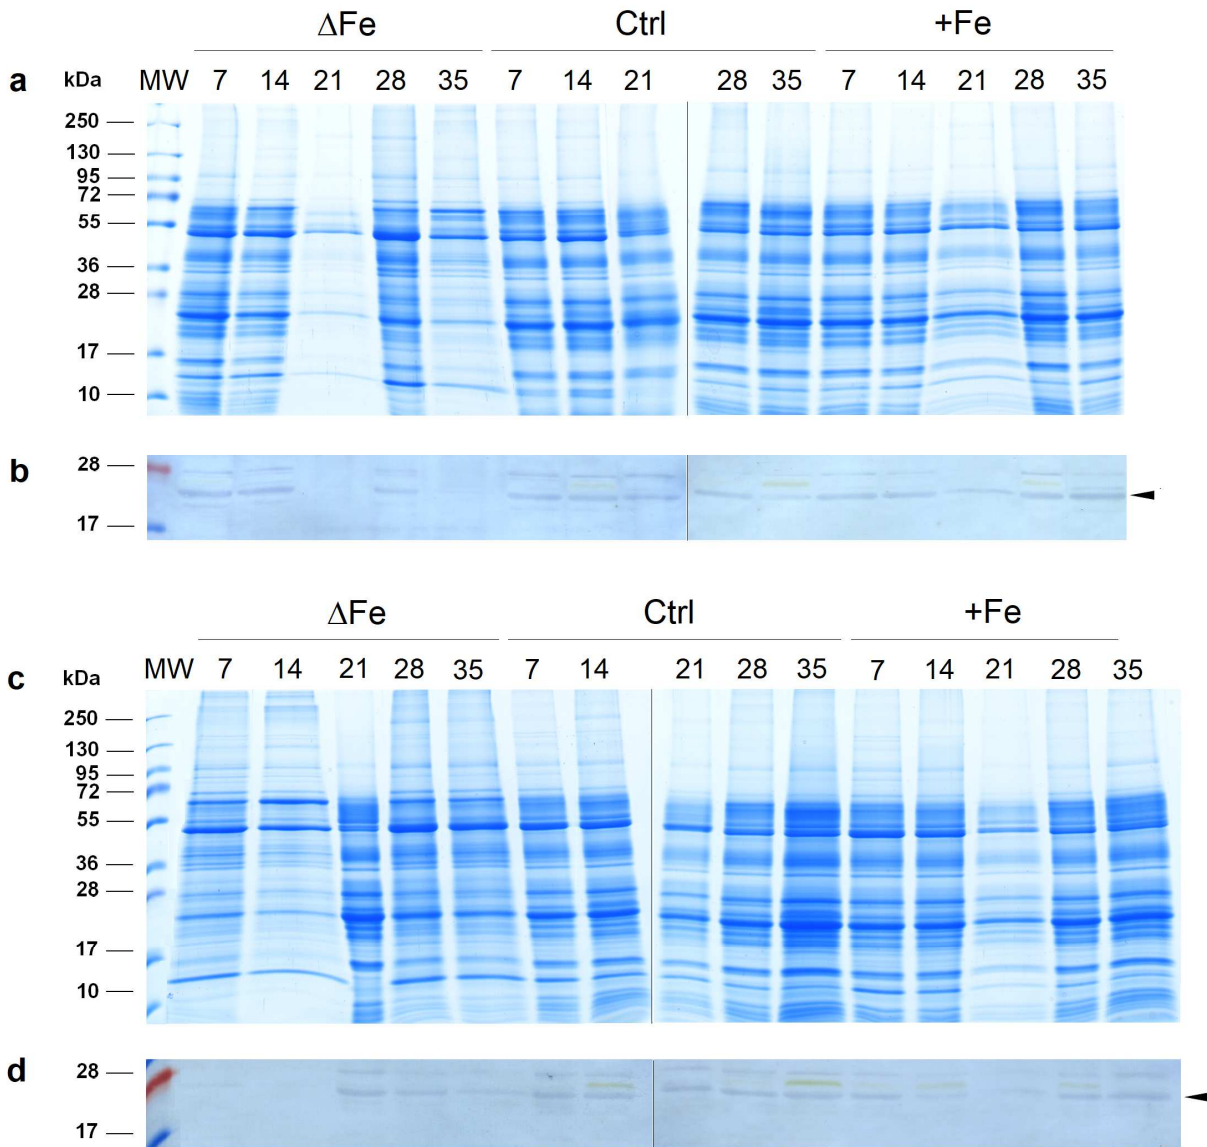

**Supplementary Fig. S4** Coomassie stained SDS PAGE pattern of total chloroplast proteins isolated from 4<sup>th</sup> and 6<sup>th</sup> leaves (**a&c**, respectively) and immunoblot against NiCo on the identical samples (**b&d**, respectively). Lanes on protein gels and immunoblots were loaded with 20  $\mu$ g protein except lanes belonging to the following samples: 4<sup>th</sup> leaves (A):  $\Delta$ Fe 21 days (4  $\mu$ g);  $\Delta$ Fe 35 days (18  $\mu$ g); +Fe 21 days (18  $\mu$ g); 6<sup>th</sup> leaves (C):  $\Delta$ Fe 14 days (12  $\mu$ g); Ctrl 21 days (11  $\mu$ g); +Fe 21 days (15  $\mu$ g), due to low protein concentration in the samples. The 26 kDa band (arrowheads) is identified as BnNiCo (see Supplementary Fig. S2).  $\Delta$ Fe – Fe deficiency, Ctrl – optimal Fe nutrition (control), +Fe – superoptimal Fe nutrition. Numbers indicate the time of treatment (days) of the isolates. As for

molecular weight standard (MW) PageRuler™ Plus Prestained Protein Ladder (Thermo-Fisher Scientific; Lot.: 00463463) was used

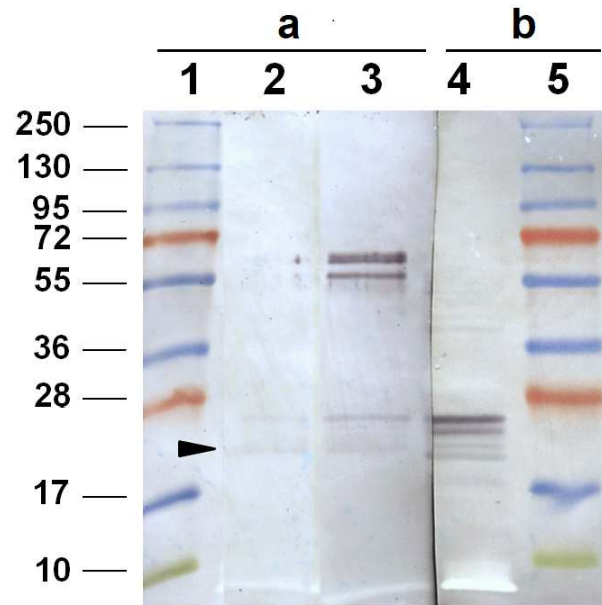

**Supplementary Fig. S5.** Identification of BnPIC1 protein. Marks: 1, 5 – molecular weight standard; 2 – total chloroplast proteins solubilized according to Laemmli UK (1970) Nature 227: 680; 3 – chloroplast inner envelope membrane fraction, isolated according to Solti et al. (2014, New Phytol 202: 920) and solubilized according to Duy D et al. (2007, Plant Cell 19: 986). using  $250 \mu\text{g ml}^{-1}$  Pefabloc instead of PMSF; 4 – total chloroplast proteins solubilized according to Laemmli (1970). Samples were run on the same gel and blotted to the same nitrocellulose membrane. After blotting, the membrane was cut (**a** and **b**) and treated with the antibodies separately. **a** – immunoblot against PIC1 using rabbit polyclonal antibodies directed against PIC1 from *Arabidopsis*; **b** – immunoblot against LHCII using rabbit polyclonal antibodies against Light Harvesting Complex II apoprotein. As for molecular weight standards, PageRuler™ Plus Prestained Protein Ladder (Thermo-Fisher Scientific; Lot.: 00463463) was used. Lanes were loaded with  $30 \mu\text{g}$  solubilised protein. Arrowhead is pointing on BnPIC1 at 21 kDa

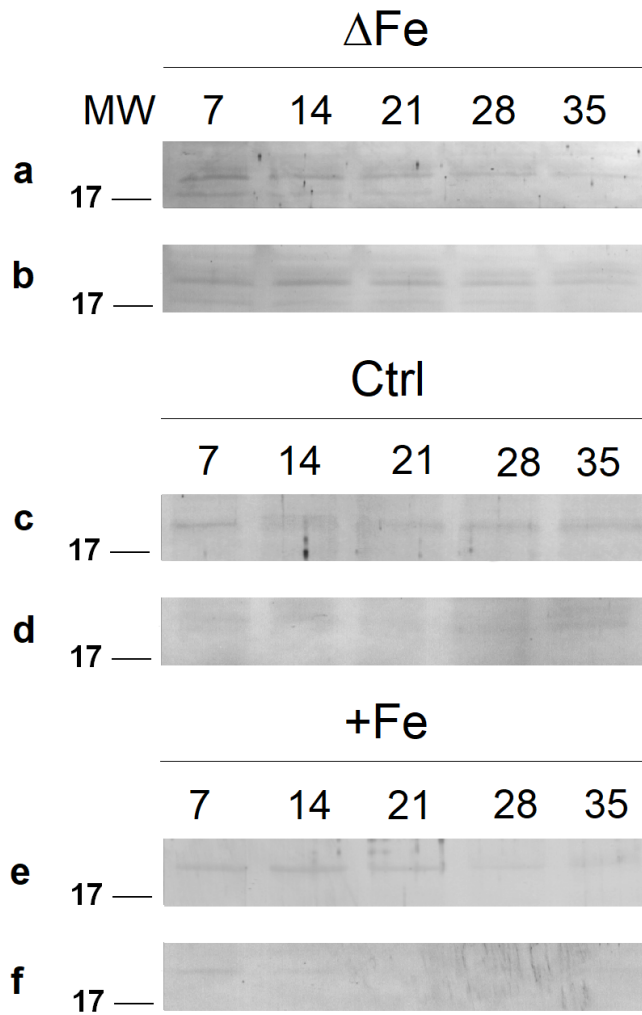

**Supplementary Fig. S6** Immunoblot against PIC1. Lanes were loaded with 20  $\mu\text{g}$  protein except lanes belonging to the following samples: 4<sup>th</sup> leaves (**a**):  $\Delta\text{Fe}$  21 days (4  $\mu\text{g}$ );  $\Delta\text{Fe}$  35 days (18  $\mu\text{g}$ ); (**e**) +Fe 21 days (18  $\mu\text{g}$ ); 6<sup>th</sup> leaves (**b**):  $\Delta\text{Fe}$  14 days (12  $\mu\text{g}$ ); (**d**) Ctrl 21 days (11  $\mu\text{g}$ ); (**f**) +Fe 21 days (15  $\mu\text{g}$ ), due to low protein concentration in the samples. The 21 kDa band (arrowheads) is identified as BnPIC1 (see Supplementary Fig. S5).  $\Delta\text{Fe}$  – Fe deficiency, Ctrl – optimal Fe nutrition (control), +Fe – superoptimal Fe nutrition. Numbers indicate the time of treatment (days) of the isolates. As for molecular weight standard (MW) PageRuler™ Plus Prestained Protein Ladder (Thermo-Fisher Scientific; Lot.: 00463463) was used

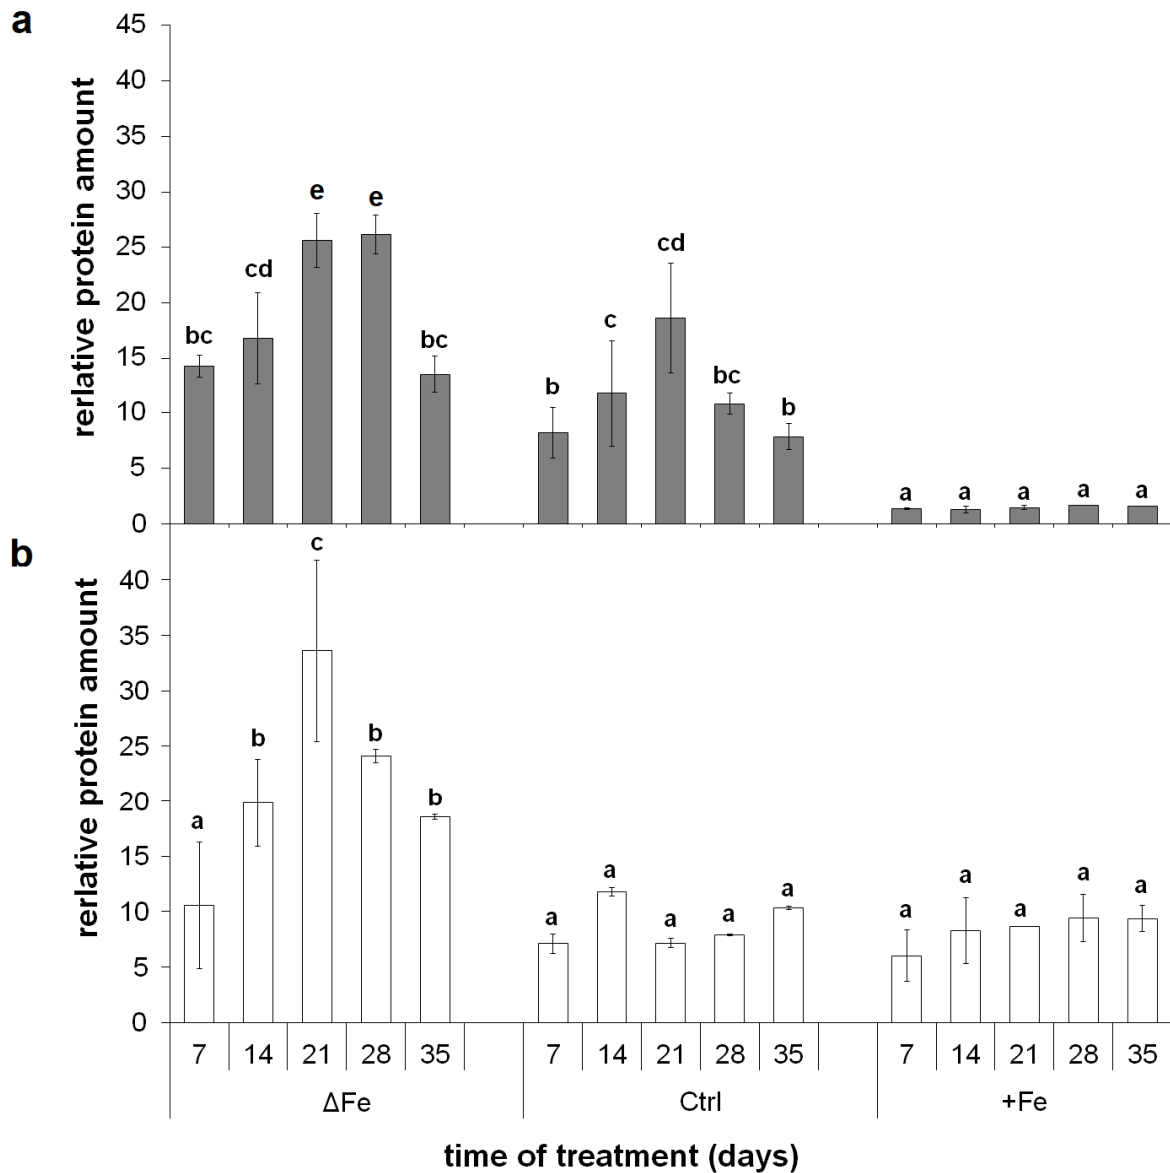

**Supplementary Fig. S7** Relative amount of PIC1 protein based on immunoblot analysis; **a** – 4<sup>th</sup> leaves; **b** – 6<sup>th</sup> leaves.  $\Delta\text{Fe}$  – Fe deficiency, Ctrl – optimal Fe nutrition (control), +Fe – superoptimal Fe nutrition. Error bars represent SD values. To compare the differences, one-way ANOVAs were performed with Tukey-Kramer *post-hoc* tests on the treatments ( $P < 0.05$ ;  $n = 3 \times 2$  [biological  $\times$  technical])



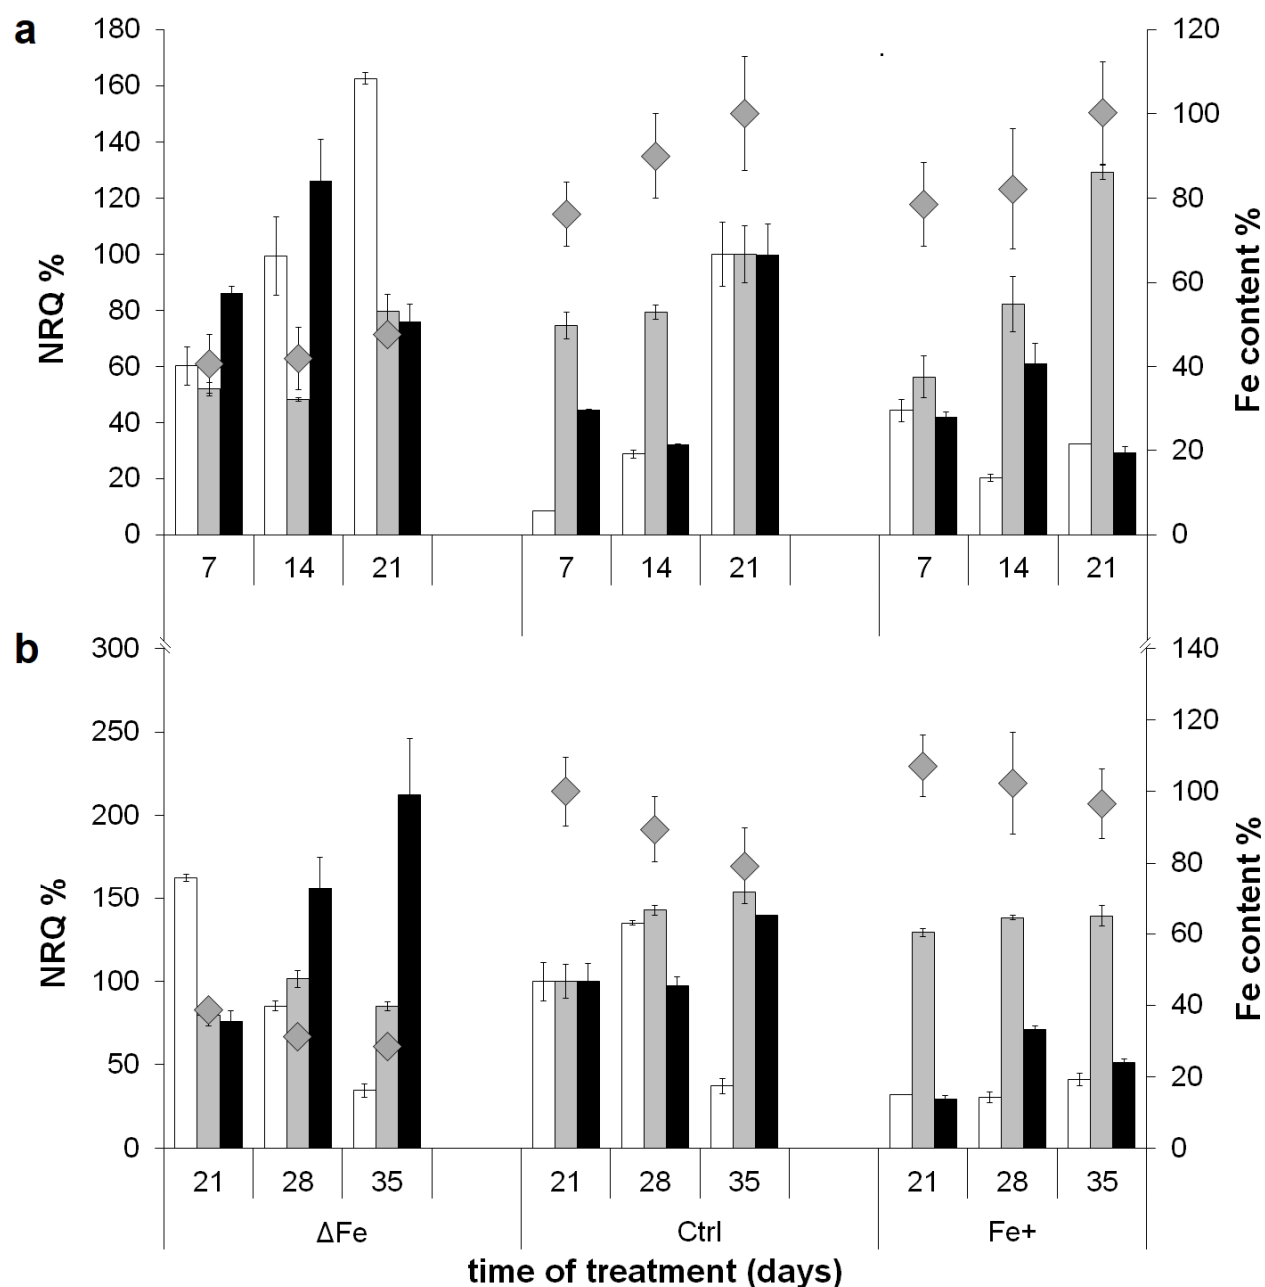

**Supplementary Fig. S8** Correlation between chloroplast Fe content and the expression of GOIs during (a) and following (b) the development of leaves, based on data of 4<sup>th</sup> leaves; Ctrl, optimal Fe nutrition (control); +Fe, supraoptimal Fe nutrition. For the easier comparison of datasets, 21-day values of optimal iron nutrition plants were chosen as basis of normalisation (100%). Diamond, chloroplast Fe content; open, grey and closed columns, expression of *BnPIC1*, *BnNiCo* and *BnMARI*, respectively
